# Supplementary material
Source: Springer Nature journal article supplement (https://www.springermedizin.de/resource/supplementary/12882_2012_492_MOESM5_ESM.pdf/9454232)

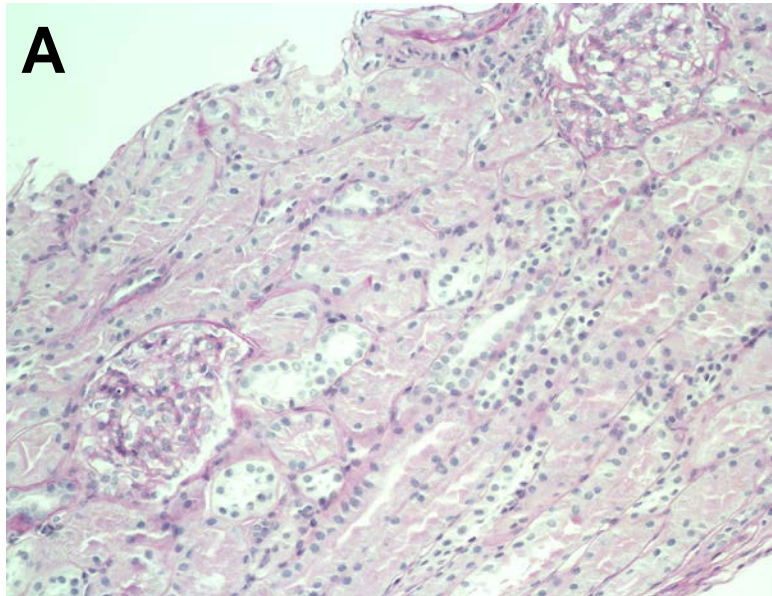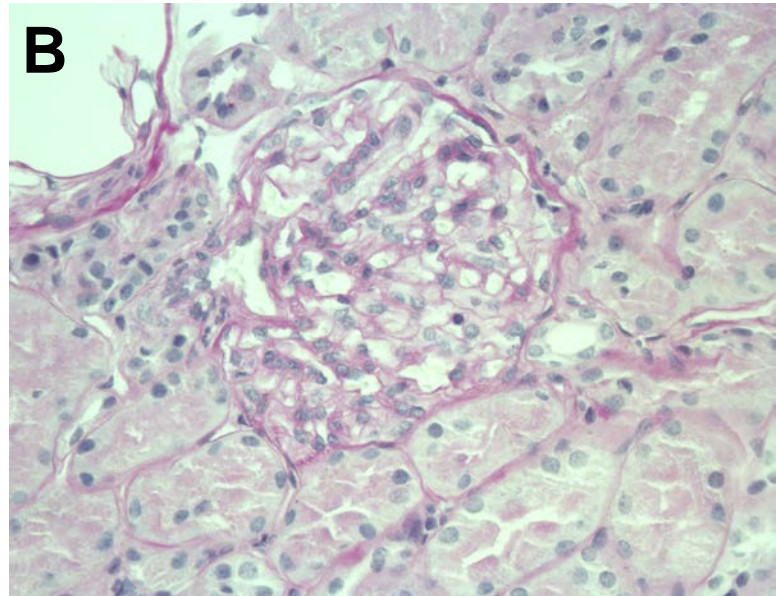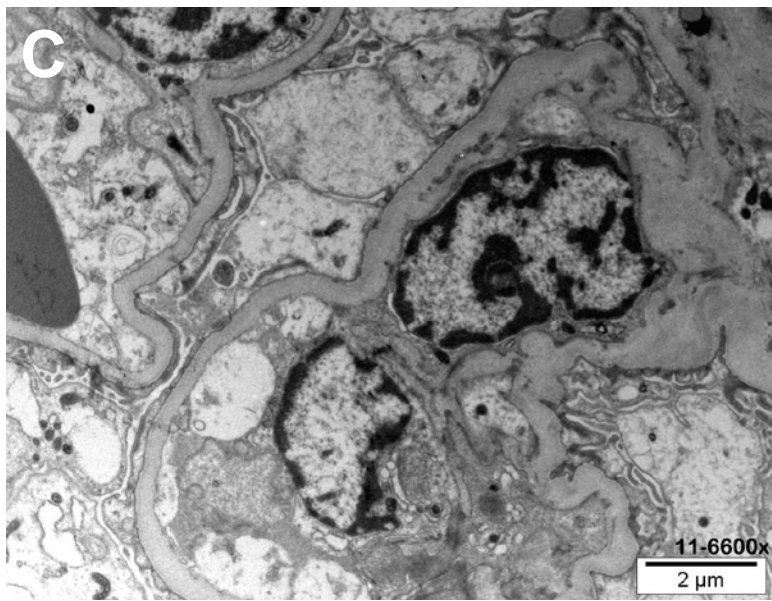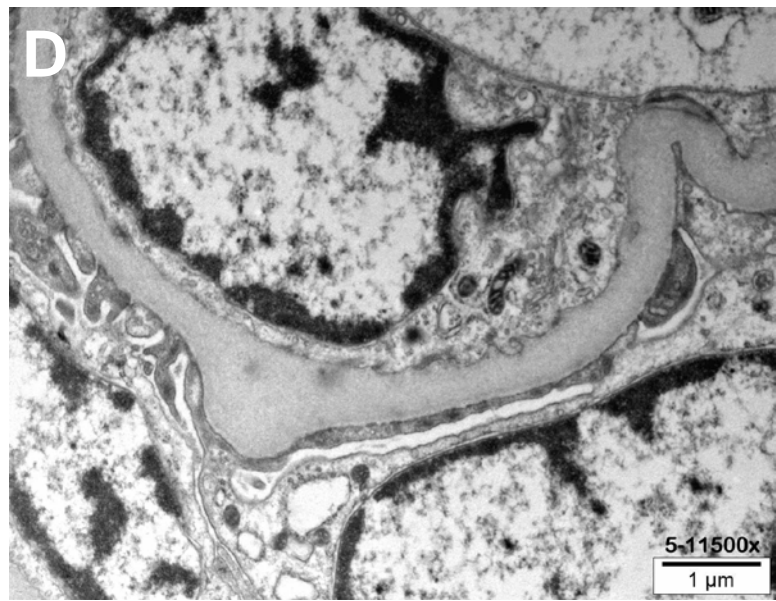

Supplement: MOESM5 [file 9454232]
